# Supplementary material for: Semi-Annual Variation of Excited Hydroxyl Emission at Mid-Latitudes
Source: Copernicus journal article supplement (doi:10.5194/angeo-2020-80), 2020-12-07
Supplement: Supplementary file [file angeo-2020-80-AC3-supplement.pdf]

Response to the comments on the paper by Referee 1

**Semi-Annual Variation of Excited Hydroxyl Emission at Mid-Latitudes**

By Mykhaylo Grygalashvyly, Alexander I. Pogoreltsev, Alexey B., Andreyev, Sergei P.

Smyshlyaev, and Gerd R. Sonnemann

We appreciate the reviewer's constructive comments and positive judgment on our paper. We have taken the reviewer's suggestions into account when preparing the revised version of our manuscript.

In the following we address the comments of the reviewer point by point.

1. The data of observations represent nightly mean values averaged over years 2010-2017. We add such notation at line 93 of the revised manuscript: “The analysis presented in this paper uses data averaged over the years 2010-2017.”
2. Following by your suggestion the labels (months) of Figures 2 and 3 were corrected.

Other changes are related to the recommendations and demands of other referee.

Thank you for taking the time to review our manuscript.

With respect,

Mykhaylo Grygalashvyly, Alexander Pogoreltsev, Alexey Andreyev, Sergei Smyshlyaev, and Gerd Reinhold Sonnemann
